# Supplementary material for: BRCA mutations: is everything said?
Source: Springer Nature journal article supplement (doi:10.1007/s10549-018-4986-5), 2018-10-06
Supplement: MOESM1 [file 16179596]

## Sheet: BRCA1
Year	Indel	Missense	Nonsense	Splice Site	Large Rearrangements	VUS	Authors	Reference
1994	2	1	1				Yoshio et al	Science vol. 266
1994	6	2	1				Friedman et al	nature genetics 8(4):399-404
1994	4	2	2				Castilla et al	nature genetics 8(4):387-91.
1994	4						Simard et al	Nature genetics 8(4):392-8
1994						7	Friedman et al	cancer research 54(24):6374-82
1995	4	2					Struewing et al	american jorunal of human genetics 57(1):1-7.
1995	5		1				Hogervorst et al	Nature genetics 10(2):208-12
1995	3		1	2			Friedman et al	American journal of human genetics 57(6):1284-97
1995	4					1	Takahashi et al	cancer research 55(14):2998-3002
1996	5	1	1				Montagna et al	Cancer research 56(23):5466-9
1996	6	1	1	1			johannsson et al	american jorunal of human genetics 58(3):441-50.
1996		1					Barker et al	genetic epidemiology 13(6):595-604.
1996	3	2					caligo et al	oncogene 13(7):1483-8
1996		5	8			5	Durocher et al	Human Molecular Genetics Vol. 5, No. 6
1996	3		1				Phelan et al	Nature genetics 13(1):120-2
1996					1		Tangir et al	Oncogene 12(4):735-40
1997				1			Hamann et al	journal of medical genetics 34(11):884-8
1997		1	2				Sobczak et al	Oncogene 15(15):1773-9
1997	10	9	2				Stoppa-Lyonnet et al	american journal of human genetics 60(5):1021-30
1997		1	1				Håkansson et al	American journal of human genetics 60(5):1068-78
1997			1				Laplace et al	Human mutation 9(5):474-5
1997					1		PUGET et al	cancer research 57(5):828-31
1997					1		Swensen et al	Human molecular genetics 6(9):1513-7
1997				1	2		Petrij-Bosch et al	Nature genetics 17(3):341-5
1998	1	1					Santarosa et al	International journal of cancer 78(5):581-6
1998	1		4			4	wagner et al	International journal of cancer 77(3):354-60
1998			1				Eisinger et al	Cancer research 58(8):1588-92
1998	2	2				4	Newman et al	JAMA 279(12):915-21
1998	1	8	1	2			Katagiri et al	journal of human genetics 43(1):42-8
1998	4		2	2		1	Dong et al	human genetics 103(2):154-61
1998			1				Worsham et al	Diagnostic molecular pathology: the American journal of surgical pathology, part B. 7(3):164-7
1998			1				Markoff et al	European journal of human genetics: EJHG 6(2):145-50
1998				1			Bergthorsson et al	Human mutation Suppl 1:S195-7
1998	1						Presneau et al	Human genetics 103(3):334-9
1998		8					Greenman et al	Genes Chromosomes cancer 21(3):244-9
1998	1						Ottini et al	Human mutation Suppl 1:S237-9
1998	1						Schofield & Haites	Human mutation Suppl 1:S187-8
1998	1		2				Tartaglini et al	Human mutation Suppl 1:S163-6
1999	2	2		2			Diez et al	International journal of cancer 83(4):465-9
1999	4		1				Laplace et al	international journal of oncology 14(5):971-7
1999		1					Janezic et al	Human Molecular Genetics 8(5):889-97.
1999	1			1			Claes et al	Disease markers 15(1-3):69-73
1999				1			Scholl et al	American journal of medical genetics 85(2):113-6
1999					1		PUGET et al	American journal of human genetics 64(1):300-2
1999			1				Shoei-Lung Li et al	Human genetics 104(3):201-4
1999				1			Pyne et al	Mutation research 406(2-4):101-7
1999					1		Montagna et al	Oncogene 18(28):4160-5.
1999	1	1		2		1	Lallas et al	molecular genetics and metabolism 67(4):357-63
1999	1						Claes et al	human mutation 13(3):256
1999	1						Dangel et al	Human mutation 14(6):545.
1999	1						TESORIERO et al	American journal of human genetics 65(2):567-9
2000		2					Shiri Sverdlov et al	Human mutation 16(6):491-501
2000	1					1	Ozdag et al	European journal of cancer (Oxford, England: 1990) 36(16):2076-82
2000	1					1	Gao et al	Human genetics 107(2):186-91
2000	3					1	Shen et al	journal of the national medical association 92(1): 29–35
2000	4		1	1			Kiechle et al	Human mutation 16(6):529-30
2000	1						Hegde et al	Human mutation 16 (5): 422 - 30
2000	1						SPITZER et al	International journal of cancer 85(4):474-81
2000	1			1			SOARES et al	Acta medica portuguesa 13(5-6):273-6.
2001	2	1					Machackova E et al	Human Mutation 18(6):545.
2001	13	1	1	1		1	Sekine M et al	Clinical Cancer Research 7(10):3144-50
2001	1						Steinmann D et al	British Journal of Cancer 85(6):850-8.
2001	1	2					Ricevuto E et al	Clinical Cancer Research 7(6):1638-46.
2001	1						Vaziri SA et al	Human Mutation 17(1):74.
2001	7		4				Ikeda N et al	International Journal of Cancer 91(1):83-8.
2001					1		Gad S et al	Genes, chromosomes & Cancer 31(1):75-84.
2001					1		Gad S et al	Journal of Medical Genetics 38(6):388-92.
2002	2	1				2	Patmasiriwat P et al	Human Mutation 20(3):230
2002	1						Phelan CM et al	Human Mutation 20(5):352-7.
2002				2			Saxena S et al	Human Mutation 20(6):473-4.
2002	1		2				Kang HC et al	Human Mutation 20(3):235.
2002	1	2				1	Llort G et al	Human Mutation 19(3):307.
2002	1	1					Kumar BV et al	Cancer Biology & Therapy 1(1):18-21.
2002			1				Palmieri G et al	Annals of Oncology 13(12):1899-907.
2002	2						Yassaee VR et al	Breast Cancer Research 4(4):R6.
2002	2	1		3			de la Hoya M et al	International Journal of cancer 97(4):466-71
2002					1		Frolov A et al	Genes chromosomes & Cancer 35(3):232-41.
2002					3		Casilli F et al	Human Mutation ;20(3):218-26
2002		1					Kringen P et al	Electrophoresis 23(24):4085-91
2002						2	Arnold N et al	Journal of Chromatography 782(1-2):99-104.
2002	11	1	2	3			Meindl A et al	International Journal of cancer 97(4):472-80
2002	1	1				1	Zhi X et al	Human Mutation 20(6)
2003		4				6	Lee AS et al	Human Mutation 22(2):178
2003	1						Rajkumar T et al	Asian Pasific Journal of Cancer Prevention 4(3):203-8.
2003					3		Hogervorst FB et al	Cancer research 63(7):1449-53
2003	3		1	2		9	Meyer P et al	Human Mutation 22(3):259.
2003	1						Manguoglu AE et al	Human Mutation 21(4):444-5
2003						1	Martínez-Ferrandis JI et al	Human Mutation 22(5):417-8.
2003		1	1				Rostagno P et al	Journal of Human genetics 48(7):362-6
2003		6				5	Valarmathi MT et al	Human Mutation 21(1):98-9.
2003						4	Hamann U et al	European Journal of Human Genetic 11(6)
2003						3	Campos B et al	Human Mutation 22(4):337.
2004	1	3					Hedau S et al	Breast Cancer Research & Treatment 88(2):177-86
2004	1						Hadjisavvas A et al	Cancer Gnetics and Cytogenetics 151(2):152-6.
2004			1				Muller D et al	Familiar Cancer 3(1):15-20.
2004		4					Coupier I et al	Oncogene 23(4):914-9.
2004	2		1			1	Choi DH et al	Journal of Clinical Oncology 22(9):1638-45
2004	2	4	2			4	Reeves MD et al	International Journal Of Cancer 110(5):677-82
2004					1	1	Belogianni I et al	BMC Cancer 4:61.
2004			1			13	Seo JH et al	Human Mutation 24(4):350
2004		2				3	Zuhlke KA et al	Clinical Cancer Research 10(18 Pt 1):5975-80.
2004					1		Tancredi M et al	European Journal of Genetics 12(9):775-7.
2004						1	Malander S et al	European Journal of Cancer 40(3):422-8
2004						2	Brose MS et al	Genetic Testing 8(2):133-8
2004			1			6	Valarmathi MT et al	Human Mutation 23(2):205
2005	1					1	Frost P et al	Disease Markers 21(1):29-36
2005					1		Ward BD et al	The Journal of Molecular Diagnostics 7(1):139-42
2005	1						Janatova M et al	Human Mutation 25(3):319.
2005						7	Kataki A et al	Clinical Genetics 67(4):322-9
2005	4		1		1		Bergman A et al	Familial Cancer 4(2):89-96
2005	2			2		8	Song CG et al	Zhonghua Yi Xue Za Zhi 85(43):3030-4
2005	1						Tommasi S et al	Mutation Research 578(1-2):395-405
2005						4	Velasco E et al	Electrophoresis 26(13):2539-52.
2005						3	McKean-Cowdin R et al	Human Genetics 116(6):497-506
2005					3		Woodward AM et al	Journal of Medical Genetics 42(5):e31
2005			1				Pal T et al	Cancer 104(12):2807-16
2006					2		Preisler-Adams S et al	Cancer Genetics and Cytogenetics 168(1):44-9
2006					7		Walsh T et al	JAMA 295(12):1379-88
2006	3					18	Saxena S et al	BMC Medical Genetics 7:75
2006	2	3	1			3	Kim BY et al	Biochemical and Biophysical Research Communication 349(2):604-10
2006	2		1		1	1	Peixoto A et al	Familial Cancer 5(4):379-87
2006		1				1	Capalbo C et al	Annals of Oncology 17 Suppl 7:vii34-40
2006						3	Kuperstein G et al	Genetic Testing 10(1):1-7
2006			1			8	Maillet P et al	Cancer Genetics and Cytogenetics 169(1):62-8
2006						2	Giannini G et al	Breast Cancer Research and Treatment 100(1):83-91
2006	2			2		3	Song CG et al	Journal of Cancer Research and Clinical Oncology 132(10):617-26
2006						2	Salazar R et al	Cancer Letters 233(1):172-7
2006	3		1			6	Han SH et al	Clinical Genetics 70(6):496-501.
2006	2					1	Infante M et al	Journal of Human Genetics 51(7):611-7
2006						2	Chen X et al	Human Mutation 27(5):427-35
2006	8		2			3	van der Hout AH et al	Human Mutation 27(7):654-66
2006	1						Elstrodt F et al	Cancer Research 66(1):41-5
2006					1		Thomassen M et al	Cancer Genetics and Cytogenetics 168(2):168-71
2006					7		de la Hoya M et al	Clinical Chemistry 52(8):1480-5
2007						6	Beristain, E. et.al.	Breast cancer research and treatment 106 (2)
2007		1			1	3	Ang, P. et.al.	Cancer epdemiology, biomarkers & prevention: a publication of the American Association for Cancer Research, cosponsored by the American Society of Peventive Oncology 16 (11).
2007		2	1				Vinodkumar, B. et.al.	Journal of experimental and clinical cancer research: CR. 26 (3)
2007						3	Eachkoti, R. et.al.	Cancer Letters 248 (2)
2007			1			10	Awadelkarim, K.D. et.al	Breast cancer research and treatment 102 (2)
2007		1				3	Loizidou, M. et.al.	Clinical Genetics 71 (2)
2007	1						Konecny, M. et.al.	Neoplasma 54 (2)
2007	1				1		Machado, PM. Et.al.	Journal of clinical oncology: official journal of the American Society of clinical oncology. 25 (15)
2007	8				6		Ramus, S.J. et.al.	Human mutation 28 (12)
2007	2						Tikhomirova, O.S. et.al.	Genetika 43 (9)
2007					5		Vasickova, P. et.al.	BMC medical genetics 8 (32)
2007					2		Lim, Y.K. et.al. Clinical genetics 71 (4)
2007					2		Armaou, S. et.al.	European Journal of Cancer 43 (2)
2007					1		Zikan, M. et.al.	Mutatio research 637 (1-2):205-8.
2008	1					2	Miramar, M.D. et. al.	Breast cancer research and treatment 112 (2)
2008	4		1			4	Cardeñosa, E.E.et. al.	Breast cancer research and treatment 112 (1)
2008					1		Palanca, S.S. et. al.	Breast cancer research and treatment 112 (1)
2008					2		Krajc, M. et. al.	BMC medical genetics 9 (83)
2008					12		Engert, S. et. al.	Human mutation 29 (7)
2008	1						Konecny, M. et. al.	Breast cancer research and treatment 109 (3)
2008					1		Pylkäs, K .et. al.	BMC Cancer 8 (146)
2008					7		Staaf, J.et. al.	Human mutation 29 (4)
2008	1	1		3		9	Thirthagiri, E. et. al.	Breast cancer research: BCR. 10 (4)
2008						1	Cvok, M.L. et. al.	Clinical chemistry and laboratoy medicine. 46(10)
2008	1				2		Ratajska, M. et.al.	Oncology reports 19 (1)
2008		9				1	Haitian, Z. et. al.	Breast 17 (6)
2008				1			Malif, F.K.	International seminars in surgical oncology: ISSO 5(21)
2008	2	1				3	De Silva, W. et. al.	BMC Cancer 8 (214)
2008	10	2					Machackova, E. et. al.	BMC cancer 8 (140)
2009	2	1					Vaidyanathan, K. et. al.	Journal of biosciences 34 (3)
2009					2		Hansen, T.V. et. al	Breast cancer research and treatment 115 (2)
2009					1		Marino, M. et. al.	Clinica chimica acta; international journal of clinical chemistry 403 (1-2)
2009					1		Seong, M.W. et. al.	Familial cnacer 8 (4)
2009				1			Zhou, J. et. al.	Nan Fang Yi Ke Da Xue Xue Bao. 29 (2)
2010					5		Ticha, I. et. al.	Breast cancer research and treatment 124 (2)
2010					1		Zhang, J.et. al.	Breast cancer research and treatment 124 (1)
2010	1						Hansen, T.V. et. al.	Breast cancer research and treatment 124 (2)
2010						1	Aktas, D. et. al.	Gynecologic oncology 119 (1)
2010					3		Del Valle, J.et. al.	Breast cancer research and treatment 122 (3)
2010	3		2				Hennessy,B.T. et. al.	Journal of clinical oncology: official of the American Society of clinical oncology. 28 (22)
2010					2	4	Cherbal, F. et. al.	Disease markers 28 (6)
2010	31	8	16			128	Borg, A. et. al.Human mutation 31 (3)
2010					2		Sharifah, N.A.	Cancer epidemiology 34 (4)
2010			1				Iyevleva, A.G. et. al.	Cancer Letters 298 (2)
2011							Pisanò, M. et. al.	Familial cancer 10 (1)
2011					1		Del Valle, J. et. al.	Breast cnacer research and treatment 130 (1)
2011	1						Diez, O. et. al.	Oncology letters 2 (6)
2011					2		Sanchez, A. et. al.	Breast cancer research and treatment 128 (3)
2011						3	Ratanaphan, A. et. al.	Journal of genetics 90 (2)
2011					1		Kwong, A. et. al.	Familial cancer 10 (2)
2011						3	Konecny, M. et. al.	Breast cancer research and treatment 126 (1)
2011						2	Lheureux, S. et. al.	Breast cancer research and treatment 125 (3)
2011					1		Sluiter, M.D. et. al.	Breast cancer research and tretament 125 (2)
2011	9	4		2		1	Hansen, T.V. et. al.	Familial cancer 10 (2)
2011		2				2	Keshavarzi, F. et. al.	Irinanian Journal of public health 40 (2)
2011	2						De Leeneer, K. et. al.	Breast cancer research and treatment 132 (1)
2012	1	3					Saleh-Gohari, N. et. al.	Iranian journal of cancer prevention 5 (4)
2012	1					1	Tazzite, A. et. al.	Gynecologic oncoclogy 125 (3)
2012							Ruiz de Garibay, G. et. al.	Breast cancer research and treatment 133 (1)
2012				1			Mahfoudh, W. et. al.	Molecular biology reports 39 (2)
2012	1						Silva, A.G. et. al.	BMC Cancer 12 (237)
2012					1		Herman, S.et. al.	Genetics and molecular biology 35 (1)
2012	3		1				Ghiorzo, P. et. al.	The journal of pathology 226 (5)
2012						1	Cortesi, L. et. al.	Breast cancer research and treatment 134 (1)
2012	1	6					Zhang, M. et. al.	Breast cancer research and treatment 132 (1)
2012						4	Kuo, W.H. et. al.	Journal of human genetics 57 (2)
2012						11	Cherbal, F.et. al.	Disease markers 32 (6)
2012			1				Novaković, S. et.al.	International journalof oncology 41 (5)
2012			1				Noh, J.M. et. al.	Breast cancer research and treatment 131 (1)
2012	2					3	Vaca, P.F. et. al.	PLoS One 7 (5)
2013	2	0	0	0	0	0	de Juan Jiménez I, García Casado Z, Palanca Suela S, Esteban Cardeñosa E, López Guerrero JA, Segura Huerta Á, Chirivella González I, Sánchez Heras AB, Juan Fita MJ, Tena García I, Guillen Ponce C, Martínez de Dueñas E, Romero Noguera I, Salas Trejo D, Goicoechea Sáez M, Bolufer Gilabert P.	Fam Cancer. 2013 Dec;12(4):767-77. doi: 10.1007/s10689-013-9622-2.
2013	0	0	0	0	1	0	Rudnicka H, Debniak T, Cybulski C, Huzarski T, Gronwald J, Lubinski J, Gorski B.	Mol Biol Rep. 2013 Dec;40(12):6619-23. doi: 10.1007/s11033-013-2775-0. Epub 2013 Sep 25.
2013	0	0	0	0	1	0	VAHID R. YASSAEE1,2, BABAK EMAMALIZADEH2∗ and MIR DAVOOD OMRANI2	J Genet. 2013 Apr;92(1):131-4.
2013	1	0	0	0	0	0	Holzmann C1, Bauer I, Meyer P.	Eur J Med Genet. 2013 Oct;56(10):577-9. doi: 10.1016/j.ejmg.2013.07.006. Epub 2013 Aug 14.
2013	1	0	0	0	0	0	Salgado J1, Santisteban M, Gutiérrez C, Gil C, Robles M, Viedma A, Patiño-García A.	Oncol Lett. 2013 Sep;6(3):725-727. Epub 2013 Jul 3
2013	0	0	0	1	0	0	Berzina D 1 , Nakazawa-Miklasevica M , Zestkova J , Aksenoka K , Irmejs A , Gardovskis A , Kalniete D , Gardovskis J , Miklasevics E .	BMC Med Genet. 2013 14 de junio; 14: 61. doi: 10.1186 / 1471-2350-14-61.
2013	1	0	0	0	0	0	Campos B1, Balmaña J, Gardenyes J, Valenzuela I, Abad O, Fàbregas P, Volpini V, Díez O.	Breast Cancer Res Treat. 2013 Jun;139(2):597-602. doi: 10.1007/s10549-013-2538-6. Epub 2013 Apr 27.
2013	0	1	0	0	0	0	Chakraborty A1, Katarkar A, Chaudhuri K, Mukhopadhyay A, Basak J.	Cell Mol Biol Lett. 2013 Dec;18(4):631-8. doi: 10.2478/s11658-013-0110-3. Epub 2013 Dec 2.
2013	0	0	1	0	0	6	Laraqui A1, Uhrhammer N, Lahlou-Amine I, El Rhaffouli H, El Baghdadi J, Dehayni M, Moussaoui RD, Ichou M, Sbitti Y, Al Bouzidi A, Amzazi S, Bignon YJ.	Int J Med Sci. 2013;10(1):60-7. doi: 10.7150/ijms.5014. Epub 2012 Dec 10.
2013	1	2	0	0	1	0	Weitzel JN1, Clague J, Martir-Negron A, Ogaz R, Herzog J, Ricker C, Jungbluth C, Cina C, Duncan P, Unzeitig G, Saldivar JS, Beattie M, Feldman N, Sand S, Port D, Barragan DI, John EM, Neuhausen SL, Larson GP.	J Clin Oncol. 2013 Jan 10;31(2):210-6. doi: 10.1200/JCO.2011.41.0027. Epub 2012 Dec 10.
2013	0	0	1	0	0	0	Stordal B 1 , Timms K , Farrelly A , Gallagher D , Busschots S , Renaud M , Thery J , Williams D , Potter J , Tran T , Korpanty G , Cremona M , Carey M , Li J , Li Y , Aslan O , O 'Leary JJ , Mills GB , Hennessy BT .	Mol Oncol. 2013 Jun;7(3):567-79. doi: 10.1016/j.molonc.2012.12.007. Epub 2013 Jan 31.
2013	0	0	0	0	0	1	Stavropoulou AV1, Fostira F, Pertesi M, Tsitlaidou M, Voutsinas GE, Triantafyllidou O, Bamias A, Dimopoulos MA, Timotheadou E, Pectasides D, Christodoulou C, Klouvas G, Papadimitriou C, Makatsoris T, Pentheroudakis G, Aravantinos G, Karydakis V, Yannoukakos D, Fountzilas G, Konstantopoulou I.	PLoS One. 2013;8(3):e58182. doi: 10.1371/journal.pone.0058182. Epub 2013 Mar 11.
2013	0	0	0	0	1	0	Sarai Palanca • Inmaculada de Juan • Gema Perez-Simo ´ • Eva Barraga ´n • Isabel Chirivella • Eduardo Martı ´nez • O ´ scar Fuster • Pascual Bolufer
2013	3	0	0	0	1	0	Pal T1, Bonner D, Cragun D, Johnson S, Akbari M, Servais L, Narod S, Vadaparampil S.	J Community Genet. 2014 Apr;5(2):157-65. doi: 10.1007/s12687-013-0166-9. Epub 2013 Aug 29.
2014	0	0	0	0	3	0	Seong MW, Cho SI, Kim KH, Chung IY, Kang E, Lee JW, Park SK, Lee MH, Choi DH, Yom CK, Noh WC, Chang MC, Park SS, Kim SW1; Korean Hereditary Breast Cancer Study Group.	BMC Cancer. 2014 Sep 1;14:645. doi: 10.1186/1471-2407-14-645
2014	0	0	0	0	1	0	Bell K1, Hodgson N, Levine M, Sadikovic B, Zbuk K.	Breast Cancer Res Treat. 2014 Jul;146(2):447-50. doi: 10.1007/s10549-014-3011-x. Epub 2014 Jun 12.
2014	0	0	0	0	1	0	Cho JY1, Cho DY, Ahn SH, Choi SY, Shin I, Park HG, Lee JW, Kim HJ, Yu JH, Ko BS, Ku BK, Son BH.	Fam Cancer. 2014 Jun;13(2):205-11. doi: 10.1007/s10689-014-9704-9.
2014	0	0	0	0	13	0	Jackson SA1, Davis AA, Li J, Yi N, McCormick SR, Grant C, Fallen T, Crawford B, Loranger K, Litton J, Arun B, Vande Wydeven K, Sidani A, Farmer K, Sanders M, Hoskins K, Nussbaum R, Esserman L, Garber JE, Kaklamani VG; Northwestern Cancer Genetics Group.	Cancer. 2014 May 15;120(10):1557-64. doi: 10.1002/cncr.28577. Epub 2014 Feb 12.
2014	0	0	0	0	1	0	Fachal L1, Blanco A1, Santamariña M2, Carracedo A1, Vega A1.	PLoS One. 2014 Mar 31;9(3):e93306. doi: 10.1371/journal.pone.0093306. eCollection 2014.
2014	1	0	0	0	0	0	Kim HS1, Lee SW1, Choi YJ1, Shin SW1, Kim YH1, Cho MS2, Lee SN3, Park KH1.	Cancer Res Treat. 2015 Jul;47(3):534-8. doi: 10.4143/crt.2013.151. Epub 2014 Oct 17.
2014	1	0	0	0	0	0	Concolino P1, Costella A2, Minucci A2, Scaglione GL2, Santonocito C2, Salutari V3, Scambia G3, Zuppi C2, Capoluongo E4.	Clin Chim Acta. 2014 Nov 1;437:72-7. doi: 10.1016/j.cca.2014.06.026. Epub 2014 Jul 5
2014	0	1	0	0	0	0	Yadav DS1, Chattopadhyay I, Verma A, Devi TR, Singh LC, Sharma JD, Kataki ACh, Saxena S, Kapur S.	Tumour Biol. 2014 Sep;35(9):9317-30. doi: 10.1007/s13277-014-2222-4. Epub 2014 Jun 19
2014	1	0	0	0	0	0	Jia H1, Guo Y2, Zhao W3, Wang K4.	Sci Rep. 2014 Jul 18;4:5737. doi: 10.1038/srep05737.
2014	3	0	0	0	2	0	Janavičius R1, Rudaitis V2, Mickys U3, Elsakov P4, Griškevičius L5.	Cancer Genet. 2014 May;207(5):195-205. doi: 10.1016/j.cancergen.2014.05.002. Epub 2014 May 10
2014	1	0	1	0	0	0	Bensam M1, Hafez E, Awad D, El-Saadani M, Balbaa M.	Biochem Genet. 2014 Feb;52(1-2):15-28. doi: 10.1007/s10528-013-9623-8. Epub 2013 Jul 23
2014	0	0	1	0	0	0	Gabaldó Barrios X1, Sarabia Meseguer MD, Alonso Romero JL, Marín Vera M, Marín Zafra G, Sánchez Henarejos P, Sánchez Bermúdez AI, Ruiz Espejo F.	Fam Cancer. 2014 Sep;13(3):431-5. doi: 10.1007/s10689-014-9708-5.
2014	0	0	1	0	0	0	Biunno I1, Aceto G, Awadelkarim KD, Morgano A, Elhaj A, Eltayeb EA, Abuidris DO, Elwali NE, Spinelli C, De Blasio P, Rovida E, Mariani-Costantini R.	Fam Cancer. 2014 Sep;13(3):437-44. doi: 10.1007/s10689-014-9717-4
2015	1	1	0	0	0	0	Yu Y1,2, Dong L1,2, Li D1,2, Chuai S3, Wu Z3, Zheng X1,2, Cheng Y4,2, Han L4,2, Yu J4,2, Gao M1,2.	Sci Rep. 2015 Nov 4;5:16129. doi: 10.1038/srep16129.
2015	1	0	1	0	0	0	Francies FZ1,2, Wainstein T3, De Leeneer K4, Cairns A5, Murdoch M6, Nietz S7, Cubasch H8, Poppe B9, Van Maerken T10, Crombez B11, Coene I12, Kerr R13, Slabbert JP14, Vral A15, Krause A16,17, Baeyens A18,19,20, Claes KB21	BMC Cancer. 2015 Nov 17;15:912. doi: 10.1186/s12885-015-1913-6.
2015	0	0	0	0	0	0	Gambino G1, Tancredi M1, Falaschi E2, Aretini P3, Caligo MA1.	Int J Mol Med. 2015 Apr;35(4):950-6. doi: 10.3892/ijmm.2015.2103. Epub 2015 Feb 16.
2015	8	4	0	0	3	0	Villarreal-Garza C1, Alvarez-Gómez RM, Pérez-Plasencia C, Herrera LA, Herzog J, Castillo D, Mohar A, Castro C, Gallardo LN, Gallardo D, Santibáñez M, Blazer KR, Weitzel JN.	Cancer. 2015 Feb 1;121(3):372-8. doi: 10.1002/cncr.29058. Epub 2014 Sep 18.
2015	0	15	0	0	0	0	Lu C1, Xie M1,2,3, Wendl MC1,3,4, Wang J1,2, McLellan MD1, Leiserson MD5,6, Huang KL1,2, Wyczalkowski MA1,2, Jayasinghe R1,2, Banerjee T7, Ning J1,2, Tripathi P2, Zhang Q1, Niu B1, Ye K1,3, Schmidt HK1, Fulton RS1,3, McMichael JF1, Batra P1, Kandoth C1, Bharadwaj M1, Koboldt DC1, Miller CA1, Kanchi KL1, Eldred JM1, Larson DE1,3, Welch JS2,8, You M9, Ozenberger BA1,2, Govindan R2,8, Walter MJ2,8, …	Nat Commun. 2015 Dec 22;6:10086. doi: 10.1038/ncomms10086.
2015	1	0	1	0	1	0	Wong ES1, Shekar S1, Chan CH1, Hong LZ2, Poon SY2, Silla T3, Lin C4, Kumar V4, Davila S4, Voorhoeve M3, Thike AA5, Ho GH6, Yap YS7, Tan PH5, Tan MH7, Ang P8, Lee AS9.	PLoS One. 2015 Jul 29;10(7):e0134408. doi: 10.1371/journal.pone.0134408. eCollection 2015.
2015	2	0	0	0	0	0	Dodova RI1,2, Mitkova AV3,4, Dacheva DR1,2, Hadjo LB1, Vlahova AI5,6, -Hadjieva MST7, Valev SS7, Caulevska MM1, Popova SD1, Popov IE1,2, Dikov TI5,6, Sedloev TA8,9, Ionkov AS10,11, Timcheva KV7, Christova SL5,6, Kremensky IM1, Mitev VI1,2, Kaneva RP1,2.	BMC Cancer. 2015 Jul 17;15:523. doi: 10.1186/s12885-015-1516-2
2015	1	0	0	0	0	0	Friedman E1, Efrat N2, Soussan-Gutman L3, Dvir A3, Kaplan Y3, Ekstein T4, Nykamp K4, Powers M4, Rabideau M4, Sorenson J4, Topper S4.	Br J Cancer. 2015 Feb 17;112(4):765-8. doi: 10.1038/bjc.2015.14. Epub 2015 Jan 29.
2015	0	0	0	1	0	0	Fleury H#1,2, Communal L#1,2, Carmona E1,2, Portelance L1,2, Arcand SL3, Rahimi K1,4, Tonin PN3,5,6, Provencher D1,2,7,8, Mes-Masson AM1,2,8.	Genes Cancer. 2015 Sep;6(9-10):378-398
2015	0	0	1	0	0	0	Jeon YW1, Kim RM2, Lim ST1, Choi HJ3, Suh YJ1.	J Breast Cancer. 2015 Mar;18(1):97-100. doi: 10.4048/jbc.2015.18.1.97. Epub 2015 Mar 27.
2015	0	2	0	0	0	5	Pal T1, Bonner D1, Cragun D1, Monteiro AN1, Phelan C1, Servais L2, Kim J1, Narod SA3, Akbari MR3, Vadaparampil ST1.	Cancer. 2015 Dec 1;121(23):4173-80. doi: 10.1002/cncr.29645. Epub 2015 Aug 1
2015	0	0	0	0	3	0	Kwong A1, Chen J2, Shin VY2, Ho JC3, Law FB4, Au CH5, Chan TL4, Ma ES4, Ford JM6.	Cancer Genet. 2015 Sep;208(9):448-54. doi: 10.1016/j.cancergen.2015.05.031. Epub 2015 Jun 9
2015	0	0	0	0	5	0	James PA1, Sawyer S, Boyle S, Young MA, Kovalenko S, Doherty R, McKinley J, Alsop K, Beshay V, Harris M, Fox S, Lindeman GJ, Mitchell G.	Fam Cancer. 2015 Jun;14(2):287-95. doi: 10.1007/s10689-015-9785-0
2016	0	0	0	0	2	1	Hackmann K1,2,3,4, Kuhlee F5, Betcheva-Krajcir E5, Kahlert AK5, Mackenroth L5, Klink B5,6,7,8, Di Donato N5, Tzschach A5, Kast K6,7,8,9, Wimberger P6,7,8,9, Schrock E5,6,7,8, Rump A5,6,7,8.	Breast Cancer Res Treat. 2016 Oct;159(3):585-90. doi: 10.1007/s10549-016-3956-z. Epub 2016 Aug 31.
2016	0	3	2	0	0	0	Mucaki EJ1, Caminsky NG1, Perri AM1, Lu R2, Laederach A3, Halvorsen M4, Knoll JH5,6, Rogan PK7,8,9,10.	BMC Med Genomics. 2016 Apr 11;9:19. doi: 10.1186/s12920-016-0178-5
2016	1	0	0	0	0	2	Maistro S1, Teixeira N2, Encinas G1, Katayama ML1, Niewiadonski VD3,4, Cabral LG1, Ribeiro RM3, Gaburo Junior N4, de Gouvêa AC5, Carraro DM6, Sabino EC3, Diz MD5, Chammas R1, de Bock GH7, Folgueira MA8.	BMC Cancer. 2016 Dec 3;16(1):934
2016	4	1	0	0	0	0	Li M1, Zhang J1, Ouyang T1, Li J1, Wang T1, Fan Z1, Fan T1, Lin B1, Xie Y2.	Gene. 2016 Jun 10;584(1):26-30. doi: 10.1016/j.gene.2016.03.004. Epub 2016 Mar 5.
2016	0	0	1	0	0	0	Zorrieh Zahra A1, Kadkhoda S1, Behjati F2, Aghakhani Moghaddam F2, Badiei A2, Sirati F3, Afshin Alavi H4, Atri M3, Omranipour R3, Keyhani E2.
2016	0	2	0	0	0	0	Mundhofir FE1, Wulandari CE, Prajoko YW, Winarni TI.	Asian Pac J Cancer Prev. 2016;17(S3):149-53.
2016	2	0	1	0	0	0	Koczkowska M1, Zuk M1, Gorczynski A2, Ratajska M1, Lewandowska M3,4, Biernat W2, Limon J1, Wasag B1.	Cancer Med. 2016 Jul;5(7):1640-6. doi: 10.1002/cam4.748. Epub 2016 May 11
2016	0	0	0	1	0	0	Esposito MV1, Nunziato M2,3, Starnone F4, Telese A5, Calabrese A6,7, D'Aiuto G8, Pucci P9, D'Aiuto M10, Baralle F11, D'Argenio V12,13, Salvatore F14,15,16.	Int J Mol Sci. 2016 Dec 21;17(12). pii: E2145. doi: 10.3390/ijms17122145
2016	2	0	0	0	0	0	Fernandes GC1, Michelli RA2, Galvão HC2, Paula AE1, Pereira R3,4, Andrade CE2, Felicio PS5, Souza CP2, Mendes DR1, Volc S2, Berardinelli GN1, Grasel RS2, Sabato CS1, Viana DV2, Mauad EC2,6, Scapulatempo-Neto C1,5,7, Arun B8, Reis RM1,2,5,9,10, Palmero EI1,2,5,11.	Oncotarget. 2016 Dec 6;7(49):80465-80481. doi: 10.18632/oncotarget.12610
2016	7	2	0	0	1	0	Mannan AU1, Singh J1, Lakshmikeshava R1, Thota N1, Singh S1, Sowmya TS1, Mishra A1, Sinha A1, Deshwal S1, Soni MR1, Chandrasekar A1, Ramesh B1, Ramamurthy B1, Padhi S1, Manek P1, Ramalingam R1, Kapoor S1, Ghosh M2, Sankaran S1, Ghosh A1, Veeramachaneni V1, Ramamoorthy P1,3, Hariharan R1,4, Subramanian K1.	J Hum Genet. 2016 Jun;61(6):515-22. doi: 10.1038/jhg.2016.4. Epub 2016 Feb 25.
2017	0	0	0	1	0	0	Yoon KA1, Kong SY2,3,4, Lee EJ5, Cho JN6, Chang S5, Lee ES3,6,7.	J Breast Cancer. 2017 Sep;20(3):310-313. doi: 10.4048/jbc.2017.20.3.310. Epub 2017 Sep 22.
2017	1	0	0	0	0	0	Jeong HM1, Kim RN1,2, Kwon MJ3,4, Oh E5,6, Han J7, Lee SK8, Choi JS9, Park S9, Nam SJ8, Gong GY10, Nam JW11, Choi DH12, Lee H13, Nam BH14, Choi YL5,6,15, Shin YK1,2,16,17.	Oncotarget. 2017 Jun 27;8(37):61538-61550. doi: 10.18632/oncotarget.18618. eCollection 2017 Sep 22.
2017	1	1	0	0	0	0	Gabaldó Barrios X1, Sarabia Meseguer MD2, Marín Vera M3, Sánchez Bermúdez AI1, Macías Cerrolaza JA4, Sánchez Henarejos P3, Zafra Poves M4, García Hernández MR3, Cuevas Tortosa E3, Aliaga Baño Á1, Castillo Guardiola V1, Martínez Hernández P1, Tovar Zapata I1, Martínez Barba E5, Ayala de la Peña F4, Alonso Romero JL3, Noguera Velasco JA1, Ruiz Espejo F1.	Fam Cancer. 2017 May 5. doi: 10.1007/s10689-017-9985-x. [Epub ahead of print]
2017	1	0	0	0	0	0	Kim DH1,2, Chae H3,4, Jo I1,5, Yoo J1,5, Lee H5, Jang W1,5, Park J1,5, Lee GD1, Jeon DS2, Lee KH6, Hur SY6, Chae BJ7, Song BJ7, Kim M1,5, Kim Y1,5.	BMC Med Genet. 2017 Mar 28;18(1):38. doi: 10.1186/s12881-017-0398-3.
2017	2	6	0	0	0	1	Atshemyan S1, Chavushyan A1, Berberian N2, Sahakyan A2, Zakharyan R1, Arakelyan A1.	F1000Res. 2017 Jan 10;6:29. doi: 10.12688/f1000research.10434.1. eCollection 2017
2017	0	6	0	0	0	0	Cherdyntseva N1,2,1, Gervas P1,1, Voropaeva E3, Denisov E1,2, Pisareva L1, Malinovskaya E1, Maksimov V3, Voevoda M3, Perinov D4, Panferova Y5, Cherdyntsev E6, Choynzonov E1.	Cancer Biomark. 2017; 18 (3): 291-296. doi: 10.3233 / CBM-161649.
2017	0	0	0	1	0	0	Krivokuca A1, Dragos VS2, Stamatovic L1, Blatnik A2, Boljevic I1, Stegel V2, Rakobradovic J1, Skerl P2, Jovandic S3, Krajc M2, Magic MB4, Novakovic S5.	Fam Cancer. 2017 Jul 6. doi: 10.1007/s10689-017-0022-x. [Epub ahead of print]
2017	1	8	0	2	0	7	Jarhelle E1,2, Riise Stensland HM1,3, Mæhle L4, Van Ghelue M5,6,7	Fam Cancer. 2017 Jan;16(1):1-16. doi: 10.1007/s10689-016-9916-2
2017	0	0	0	0	2	0	Rashid MU1,2, Muhammad N3, Amin A4, Loya A5, Hamann U6.	Breast Cancer Res Treat. 2017 Jan;161(2):191-201. doi: 10.1007/s10549-016-4044-0. Epub 2016 Nov 8.
2017	0	0	0	0	0	2	Park HS1, Park SJ2, Kim JY1, Kim S1, Ryu J1, Sohn J3, Park S1, Kim GM3, Hwang IS4, Choi JR2,4, Kim SI1.	Ann Surg Treat Res. 2017 May;92(5):331-339. doi: 10.4174/astr.2017.92.5.331. Epub 2017 Apr 27.
2017	0	0	0	0	4	0	Yaping Qian1, Debora Mancini-DiNardo1, Thaddeus Judkins, Hannah C. Cox, Krystal Brown, Maria Elias, Nanda Singh, Courtney Daniels, Jayson Holladay, Bradford Coffee, Karla R. Bowles, Benjamin B. Roa	Cancer Genet. 2017 Oct;216-217:159-169. doi: 10.1016/j.cancergen.2017.08.002. Epub 2017 Aug 24.
2017	5	5	0	0	0	0	Seth K. RummelLeann LovejoyCraig D. ShriverRachel E. Ellswort	Breast Cancer Res Treat. 2017 Aug;164(3):593-601. doi: 10.1007/s10549-017-4291-8. Epub 2017 May 13
2017	6	5	0	0	0	0	Santonocito C1, Scapaticci M2, Guarino D1, Bartolini A3, Minucci A1, Concolino P1, Scambia G4, Paris I4, Capoluongo E1.	Breast. 2017 Dec;36:74-78. doi: 10.1016/j.breast.2017.09.007. Epub 2017 Oct 8.
2017	0	0	0	0	0	2	Cock-Rada AM1,2,3, Ossa CA4, Garcia HI4,5, Gomez LR4,5.	Fam Cancer. 2017 May 20. doi: 10.1007/s10689-017-0004-z.
2017	0	0	0	0	2	0	Preobrazhenskaya EV1, Bizin IV2, Kuligina ES1, Shleykina AY1, Suspitsin EN1,3, Zaytseva OA1, Anisimova EI4, Laptiev SA5, Gorodnova TV1, Belyaev AM1, Imyanitov EN1,3,5,6, Sokolenko AP7,8,9.	Breast Cancer Res Treat. 2017 Oct;165(3):765-770. doi: 10.1007/s10549-017-4357-7. Epub 2017 Jun 27
2017	0	0	0	0	2	0	McVeigh TP1, Cody N2, Carroll C2, Duff M2, Farrell M3, Bradley L2, Gallagher D4, McDevitt T2, Green AJ2	Cancer Genet. 2017 Aug;214-215:1-8. doi: 10.1016/j.cancergen.2017.02.001. Epub 2017 Mar 22
2017	0	1	0	0	0	0	Capone GL1, Putignano AL1, Saavedra ST1, Paganini I1, Sestini R1, Gensini F1, De Rienzo I1, Papi L2, Porfirio B1.	J Mol Diagn. 2017 Oct 20. pii: S1525-1578(17)30338-0. doi: 10.1016/j.jmoldx.2017.09.005. [Epub ahead of print]
2017	3	2	0	0	0	8	Zanella I1, Merola F2, Biasiotto G3, Archetti S2, Spinelli E4, Di Lorenzo D2.	Exp Mol Pathol. 2017 Apr;102(2):314-320. doi: 10.1016/j.yexmp.2017.03.001. Epub 2017 Mar 2
2017	1	0	0	0	0	1	Cherdyntseva N1,2,1, Gervas P1,1, Voropaeva E3, Denisov E1,2, Pisareva L1, Malinovskaya E1, Maksimov V3, Voevoda M3, Perinov D4, Panferova Y5, Cherdyntsev E6, Choynzonov E1.	Cancer Biomark. 2017;18(3):291-296. doi: 10.3233/CBM-161649.
2017	1	0	0	1	0	5	Yang XR1, Devi BCR2, Sung H3, Guida J3, Mucaki EJ4, Xiao Y3, Best A3, Garland L5, Xie Y3, Hu N3, Rodriguez-Herrera M3, Wang C3, Jones K5, Luo W5, Hicks B5, Tang TS2, Moitra K3,6, Rogan PK4, Dean M3.	Breast Cancer Res Treat. 2017 Oct;165(3):687-697. doi: 10.1007/s10549-017-4356-8. Epub 2017 Jun 29.

## Sheet: BRCA2
Year	Indel	Missense	Nonsense	Splice Site	Large Rearrangements	VUS	Authors	Reference
1995	6						Wooster et al	Nature 378(6559):789-92
1996	1	1					Lancaster et al	nature genetics 13(2):238-40.
1996	2	1					Miki et al	Nature genetics 13(2):245-7
1997	1	1					Osorio et al	cancer letters 121(2):115-8
1997	2		1				INOUE et al	international journal of cancer 74(2):199-204
1997	2	1					Mavraki et al	British journal of cancer 76(11):1428-31
1997	8		2				Håkansson et al	American journal of human genetics 60(5):1068-78
1997	2						Schubert et al	american journal of human genetics 60(5):1031-40
1998	2	7	1	3			Katagiri et al	journal of human genetics 43(1):42-8
1998	2	1	3				Ganguly et al	human genetics 102(5):549-56
1998					1		Nordling et al	Cancer research 58(7):1372-5
1998					1		Savelyeva et al	Cancer research 58(5):863-6
1999	3	44					Wagner et al	Human molecular genetics 8(3):413-23
1999	1						Claes et al	Disease markers 15(1-3):69-73
1999	2						Shoei-Lung Li et al	Human genetics 104(3):201-4
1999	4						Csokay et al	Cancer research 59(5):995-8
1999	1						Claes et al	human mutation 13(3):256
2000		5					Shiri Sverdlov et al	Human mutation 16(6):491-501
2000	1						Ozdag et al	European journal of cancer (Oxford, England: 1990) 36(16):2076-82
2000	3						Gao et al	Human genetics 107(2):186-91
2000						2	Sinclair et al	Cancer research 60(5):1371-5
2000	3		1				Kiechle et al	Human mutation 16(6):529-30
2000	1		2				Ottini et al	Breast cancer research 2(4):307-10. Epub 2000 Mar 31
2000	1	1					PLASCHKE et al	journal of medical genetics 37(9):E17
2000	2						Grzybowska et al	Human mutation 16(6):482-90
2000						1	SPITZER et al	International journal of cancer 85(4):474-81
2001	2						Machackova E et al	Human Mutation 18(6):545.
2001	3						Sekine M et al	Clinical Cancer Research 7(10):3144-50
2001	1						Steinmann D et al	British Journal of Cancer 85(6):850-8.
2001	1						Vaziri SA et al	Human Mutation 17(1):74.
2001	10		6	1		4	Ikeda N et al	International Journal of Cancer 91(1):83-8.
2001	2	1				1	Kwiatkowska E et al	Human Mutation 17(1):73.
2002	2					2	Patmasiriwat P et al	Human Mutation 20(3):230.
2002	1		1				Kang HC et al	Human Mutation 20(3):235.
2002	4	1		1			Llort G et al	Human Mutation 19(3):307.
2002	3						de la Hoya M et al	International Journal of cancer 97(4):466-71
2002	3		1				Tereschenko IV et al	Human Mutation 19(2):184.
2002		1				2	Kwiatkowska E et al	International Journal of cancer 98(6):943-5.
2002						1	Murphy KM et al	Cancer Research 62(13):3789-93.
2002	1	3				2	Hu N et al	Clinical Cancer Research 8(4):1121-6.
2002	1	3					Jakubowska A et al	British Journal of Cancer 87(8):888-91.
2002	17		5	4			Meindl A et al	International Journal of cancer 97(4):472-80
2002	1						El-Harith el-HA et al	Saudi Medical Journal 23(6):700-4.
2002	4		1				Hilton JL et al	Journal of the National Cancer Institute 94(18):1396-406
2002	2						Yassaee VR et al	Breast Cancer Research 4(4):R6.
2003	1		2	1		4	Meyer P et al	Human Mutation 22(3):259.
2003	1	2					Manguoglu AE et al	Human Mutation 21(4):444-5
2003	1		1	1		1	Martínez-Ferrandis JI et al	Human Mutation 22(5):417-8.
2003				1		1	Claes K et al	Genes Chromosomes Cancer 37(3):314-20.
2003	2					1	Hamann U et al	European Journal of Human Genetic 11(6)
2003	2					10	Kanaan Y et al	Human Genetics 113(5):452-60
2003	2		2				Duran M et al	Human Mutation 21(4):448
2003			1			5	Hadjisavvas A et al	Human Mutation 21(2):171
2004		1	1			8	Hadjisavvas A et al	Cancer Gnetics and Cytogenetics 151(2):152-6.
2004	2	1	1			2	Choi DH et al	Journal of Clinical Oncology 22(9):1638-45
2004	1					11	Seo JH et al	Human Mutation 24(4):350
2004					1		Martinez SL et al	Journal of medical genetics 41(2):e18
2004			3			3	Valarmathi MT et al	Human Mutation 23(2):205
2005						2	Kataki A et al	Clinical Genetics 67(4):322-9
2005	1						Bergman A et al	Familial Cancer 4(2):89-96
2005		1				4	Song CG et al	Zhonghua Yi Xue Za Zhi 85(43):3030-4
2005						13	Velasco E et al	Electrophoresis 26(13):2539-52.
2005	1						Purnomosari D et al	Journal of Clinical Pathology 58(5):493-9
2005	1						Pietschmann A et al	Journla of Cancer Research and Clinical Oncology131(8):552-8
2005	1	16				3	Chen FM et al	Cancer letters 220(2):177-84
2005					2		Woodward AM et al	Journal of Medical Genetics 42(5):e31
2005			1				Pal T et al	Cancer 104(12):2807-16
2006	2				2		Walsh T et al	JAMA 295(12):1379-88
2006	6					11	Saxena S et al	BMC Medical Genetics 7:75
2006	2	10	1			11	Kim BY et al	Biochemical and Biophysical Research Communication 349(2):604-10
2006	3		1			2	Peixoto A et al	Familial Cancer 5(4):379-87
2006	1		2	1		11	Capalbo C et al	Annals of Oncology 17 Suppl 7:vii34-40
2006			3			10	Maillet P et al	Cancer Genetics and Cytogenetics 169(1):62-8
2006	1		1			9	Giannini G et al	Breast Cancer Research and Treatment 100(1):83-91
2006						3	Song CG et al	Journal of Cancer Research and Clinical Oncology 132(10):617-26
2006	1		1			5	Salazar R et al	Cancer Letters 233(1):172-7
2006	2		1			21	Han SH et al	Clinical Genetics 70(6):496-501.
2006	3		2			2	Infante M et al	Journal of Human Genetics 51(7):611-7
2006						2	Chen X et al	Human Mutation 27(5):427-35
2006	27		7			8	van der Hout AH et al	Human Mutation 27(7):654-66
2006						2	Bonatti F et al	Cancer Genetics and Cytogenetics 170(2):93-101.
2006					2		Casilli F et al	Journal of Medical Genetics 43(9):e49.
2007			2			5	Beristain, E. et.al.	Breast cancer research and treatment 106 (2)
2007		2	7			1	Ang, P. et.al.	Cancer epdemiology, biomarkers & prevention: a publication of the American Association for Cancer Research, cosponsored by the American Society of Peventive Oncology 16 (11).
2007		1	2			3	Awadelkarim, K.D. et.al	Breast cancer research and treatment 102 (2)
2007	1					2	Loizidou, M. et.al.	Clinical Genetics 71 (2)
2007	1					4	Monne, M. et.al.	Familial Cancer 6(1)
2007	2		1				Machado, PM. Et.al.	Journal of clinical oncology: official journal of the American Society of clinical oncology. 25 (15)
2007	1				1		Ramus, S.J. et.al.	Human mutation 28 (12)
2007					4		Gutiérrez-Enríquez, S. et.al.	Breast cancer research and treatment 103 (1)
2007					1		Lim, Y.K. et.al. Clinical genetics 71 (4)
2007						1	Kwong, A. et.al.	Familial cancer 7 (2)
2007	2					8	Syamala, V.	Journal of cancer research and clinical oncology 133 (11)
2007				1			Smith, M. et.al.	Familial cancer 7 (2)
2008	1						Miramar, M.D. et. al.	Breast cancer research and treatment 112 (2)
2008	3		2			9	Cardeñosa, E.E.et. al.	Breast cancer research and treatment 112 (1)
2008					1		Staaf, J.et. al.	Human mutation 29 (4)
2008	6	2				17	Thirthagiri, E. et. al.	Breast cancer research: BCR. 10 (4)
2008						7	Cvok, M.L. et. al.	Clinical chemistry and laboratoy medicine. 46(10)
2008	2						Ratajska, M. et.al.	Oncology reports 19 (1)
2008				1			Hansen, T.V. et. al.	BMC medical genetics 9 (58)
2008	11	2					Machackova, E. et. al.	BMC cancer 8 (140)
2008				1			Smith, M. et. al.	Familial cancer 7 (2)
2008	2						Akbari, M.R.et. al.	Oncogene 27 (9)
2009	1						Vaidyanathan, K. et. al.	Journal of biosciences 34 (3)
2009			1				Torres, A. et. al.	Genetic testing and biomolecular markers 13 (5)
2009					1		Hansen, T.V. et. al	Breast cancer research and treatment 115 (2)
2009				1			Pensabene, M. et. al.	Annals of oncology: official journey of the European Society for Medical Oncology 20 (5)
2009	1		1			2	Goodheart, M.J. et. al.	Clinical genetics 76 (2)
2010					1		Del Valle, J.et. al.	Breast cancer research and treatment 122 (3)
2010						10	Cherbal, F. et. al.	Disease markers 28 (6)
2010	43	1	10			229	Borg, A. et. al.Human mutation 31 (3)
2010						1	Steffensen, A.Y. et. al.	Familial cancer 9 (3)
2010						1	Sanz, D.J. et. al.	Clinical cancer research: an official journal of the American Association for Cancer Research 16 (6)
2010	1						Diez, O. et. al.	Breast cancer research and treatment 123 (2)
2010	1						Salgado, J. et. al.	Breast cancer research and treatment 121 (1)
2010	3		1	1		3	Balabas, A.et. al.	Familial cancer 9 (3)
2011	1						Pisanò, M. et. al.	Familial cancer 10 (1)
2011					1		Muller, D. et. al.	BMC medical genetics 12 (121)
2011							Sanchez, A. et. al.	Breast cancer research and treatment 128 (3)
2011						1	Konecny, M. et. al.	Breast cancer research and treatment 126 (1)
2011	2	3		1		4	DE, Silva, S. et. al.	Experimental and therapeutic medicine 2 (6)
2011	6	10	4	2		2	Hansen, T.V. et. al.	Familial cancer 10 (2)
2011	1	2					Kuusisto, K.M. et. al.	Breast cancer research and treatment 13 (1)
2011		1					Keshavarzi, F. et. al.	Irinanian Journal of public health 40 (2)
2011	3		1			18	Kote-Jarai, Z. et. al.	British journal of cancer 105 (8)
2011		6					Zhong, L. et .al.	Asian Pacific journal of cancer prevention APJCP 12 (7)
2011	1						De Leeneer, K. et. al.	Breast cancer research and treatment 132 (1)
2011					1		Gonzalez, H.P. et. al.	Breast cancer research and treatment 126 (3)
2012				1			Anczuków, O.et. al.	Clinical cancer research: an official journal of the Amercian Association for Cancer Research 18 (18)
2012	1					5	Vietri, M.T. et. al.	Clinical chemistry and laboratory medicine 50 (12)
2012	3					2	Tazzite, A. et. al.	Gynecologic oncoclogy 125 (3)
2012					4		Ruiz de Garibay, G. et. al.	Breast cancer research and treatment 133 (1)
2012	3						Ghiorzo, P. et. al.	The journal of pathology 226 (5)
2012						24	Cherbal, F.et. al.	Disease markers 32 (6)
2012	1		1				Novaković, S. et.al.	International journalof oncology 41 (5)
2012	3						Noh, J.M. et. al.	Breast cancer research and treatment 131 (1)
2012	2						Vaca, P.F. et. al.	PLoS One 7 (5)
2013	4	0	0	1	1	0	de Juan Jiménez I, García Casado Z, Palanca Suela S, Esteban Cardeñosa E, López Guerrero JA, Segura Huerta Á, Chirivella González I, Sánchez Heras AB, Juan Fita MJ, Tena García I, Guillen Ponce C, Martínez de Dueñas E, Romero Noguera I, Salas Trejo D, Goicoechea Sáez M, Bolufer Gilabert P.	Fam Cancer. 2013 Dec;12(4):767-77. doi: 10.1007/s10689-013-9622-2.
2013	4	0	0	0	0	0	Berzina D 1 , Nakazawa-Miklasevica M , Zestkova J , Aksenoka K , Irmejs A , Gardovskis A , Kalniete D , Gardovskis J , Miklasevics E .	BMC Med Genet. 2013 14 de junio; 14: 61. doi: 10.1186 / 1471-2350-14-61.
2013	1	2	0	0	0	0	Weitzel JN1, Clague J, Martir-Negron A, Ogaz R, Herzog J, Ricker C, Jungbluth C, Cina C, Duncan P, Unzeitig G, Saldivar JS, Beattie M, Feldman N, Sand S, Port D, Barragan DI, John EM, Neuhausen SL, Larson GP.	J Clin Oncol. 2013 Jan 10;31(2):210-6. doi: 10.1200/JCO.2011.41.0027. Epub 2012 Dec 10.
2013	1	0	0	0	0	0	Dobričić J1, Krivokuća A, Brotto K, Mališić E, Radulović S, Branković-Magić M.	J Hum Genet. 2013 Aug;58(8):501-7. doi: 10.1038/jhg.2013.30. Epub 2013 May 2.
2013	2	1	0	0	0	0	Pal T1, Bonner D, Cragun D, Johnson S, Akbari M, Servais L, Narod S, Vadaparampil S.	J Community Genet. 2014 Apr;5(2):157-65. doi: 10.1007/s12687-013-0166-9. Epub 2013 Aug 29.
2013	2	0	0	0	0	0	Akbari MR1, Donenberg T, Lunn J, Curling D, Turnquest T, Krill-Jackson E, Zhang S, Narod SA, Hurley J.	Clin Genet. 2014 Jan;85(1):64-7. doi: 10.1111/cge.12132. Epub 2013 Apr 5.
2014	0	0	0	0	3	0	Jackson SA1, Davis AA, Li J, Yi N, McCormick SR, Grant C, Fallen T, Crawford B, Loranger K, Litton J, Arun B, Vande Wydeven K, Sidani A, Farmer K, Sanders M, Hoskins K, Nussbaum R, Esserman L, Garber JE, Kaklamani VG; Northwestern Cancer Genetics Group.	Cancer. 2014 May 15;120(10):1557-64. doi: 10.1002/cncr.28577. Epub 2014 Feb 12.
2014	1	0	0	0	0	0	Concolino P1, Costella A2, Minucci A2, Scaglione GL2, Santonocito C2, Salutari V3, Scambia G3, Zuppi C2, Capoluongo E4.	Clin Chim Acta. 2014 Nov 1;437:72-7. doi: 10.1016/j.cca.2014.06.026. Epub 2014 Jul 5
2014	1	0	0	0	0	0	Yadav DS1, Chattopadhyay I, Verma A, Devi TR, Singh LC, Sharma JD, Kataki ACh, Saxena S, Kapur S.	Tumour Biol. 2014 Sep;35(9):9317-30. doi: 10.1007/s13277-014-2222-4. Epub 2014 Jun 19
2014	4	0	0	0	0	0	Janavičius R1, Rudaitis V2, Mickys U3, Elsakov P4, Griškevičius L5.	Cancer Genet. 2014 May;207(5):195-205. doi: 10.1016/j.cancergen.2014.05.002. Epub 2014 May 10
2014	2	1	0	0	0	0	Balabanski L1, Antov G2, Dimova I3, Ivanov S1, Nacheva M4, Gavrilov I4, Nesheva D3, Rukova B3, Hadjidekova S3, Malinov M1, Toncheva D5.	Mol Clin Oncol. 2014 May;2(3):435-439. Epub 2014 Feb 4
2014	2	0	0	0	0	0	Akbari MR1, Donenberg T, Lunn J, Curling D, Turnquest T, Krill-Jackson E, Zhang S, Narod SA, Hurley J.	Clin Genet. 2014 Jan;85(1):64-7. doi: 10.1111/cge.12132. Epub 2013 Apr 5.
2014	0	0	0	1	0	0	Bakker JL1, Thirthagiri E, van Mil SE, Adank MA, Ikeda H, Verheul HM, Meijers-Heijboer H, de Winter JP, Sharan SK, Waisfisz Q.	Hum Mutat. 2014 Apr;35(4):442-6. doi: 10.1002/humu.22505. Epub 2014 Feb 15.
2014	1	2	0	0	0	0	Bensam M1, Hafez E, Awad D, El-Saadani M, Balbaa M.	Biochem Genet. 2014 Feb;52(1-2):15-28. doi: 10.1007/s10528-013-9623-8. Epub 2013 Jul 23
2014	0	0	1	0	0	0	Guaoua S1, Ratbi I2, Lyahyai J2, El Alaoui SC3, Laarabi FZ3, Sefiani A1.	Afr Health Sci. 2014 Jun;14(2):468-71. doi: 10.4314/ahs.v14i2.25.
2014	0	3	1	0	0	0	Maier C1, Herkommer K, Luedeke M, Rinckleb A, Schrader M, Vogel W.	Prostate. 2014 Oct;74(14):1444-51. doi: 10.1002/pros.22860. Epub 2014 Aug 11.
2014	0	1	0	0	0	0	Ayub SG 1 , Rasool S 1 , Ayub T 2 , Khan SN 3 , Wani KA 4 , Andrabi KI 1	Mol Med Rep. 2014 Feb;9(2):749-53. doi: 10.3892/mmr.2013.1862. Epub 2013 Dec 13
2014	0	0	0	0	1	0	Kim TM1, Son MY2, Dodds S2, Hu L2, Hasty P3	Mutat Res. 2014 Aug-Sep;766-767:66-72. doi: 10.1016/j.mrfmmm.2014.06.003. Epub 2014 Jun 22.
2014	0	0	0	0	1	0	Wang Q1, Chow JF, Yeung WS, Lau EY, Lee VC, Ng EH, Ho PC.	J Assist Reprod Genet. 2014 Dec;31(12):1719-26. doi: 10.1007/s10815-014-0355-4. Epub 2014 Oct 11
2015	0	1	0	0	0	0	Yu Y1,2, Dong L1,2, Li D1,2, Chuai S3, Wu Z3, Zheng X1,2, Cheng Y4,2, Han L4,2, Yu J4,2, Gao M1,2.	Sci Rep. 2015 Nov 4;5:16129. doi: 10.1038/srep16129.
2015	0	0	1	0	0	4	Francies FZ1,2, Wainstein T3, De Leeneer K4, Cairns A5, Murdoch M6, Nietz S7, Cubasch H8, Poppe B9, Van Maerken T10, Crombez B11, Coene I12, Kerr R13, Slabbert JP14, Vral A15, Krause A16,17, Baeyens A18,19,20, Claes KB21	BMC Cancer. 2015 Nov 17;15:912. doi: 10.1186/s12885-015-1913-6.
2015	1	0	0	0	0	0	Hadiji-Abbes N1, Trifa F1, Choura M1, Khabir A2, Sellami-Boudawara T2, Frikha M2, Daoud J2, Mokdad-Gargouri R3.	Pathol Biol (Paris). 2015 Sep;63(4-5):185-9. doi: 10.1016/j.patbio.2015.07.009. Epub 2015 Aug 29.
2015	2	0	0	0	0	0	Hernan I1, Mañé B, Borràs E, de Sousa Dias M, Llort G, Yagüe C, Gamundi MJ, Arcusa À, Carballo M.	Clin Transl Oncol. 2015 Jul;17(7):576-80. doi: 10.1007/s12094-014-1271-x. Epub 2015 Jan 14.
2015	6	0	0	0	0	0	Villarreal-Garza C1, Alvarez-Gómez RM, Pérez-Plasencia C, Herrera LA, Herzog J, Castillo D, Mohar A, Castro C, Gallardo LN, Gallardo D, Santibáñez M, Blazer KR, Weitzel JN.	Cancer. 2015 Feb 1;121(3):372-8. doi: 10.1002/cncr.29058. Epub 2014 Sep 18.
2015	0	0	0	0	1	0	Timoteo AR1, Albuquerque BM2, Moura PC3, Ramos CC4, Agnez-Lima LF1, Walsh T5, King MC5, Lajus TB3.	Hered Cancer Clin Pract. 2015 Jan 16;13(1):2. doi: 10.1186/s13053-014-0022-x. eCollection 2015.
2015	8	0	0	0	0	0	Wong ES1, Shekar S1, Chan CH1, Hong LZ2, Poon SY2, Silla T3, Lin C4, Kumar V4, Davila S4, Voorhoeve M3, Thike AA5, Ho GH6, Yap YS7, Tan PH5, Tan MH7, Ang P8, Lee AS9.	PLoS One. 2015 Jul 29;10(7):e0134408. doi: 10.1371/journal.pone.0134408. eCollection 2015.
2015	2	0	0	0	0	0	Dodova RI1,2, Mitkova AV3,4, Dacheva DR1,2, Hadjo LB1, Vlahova AI5,6, -Hadjieva MST7, Valev SS7, Caulevska MM1, Popova SD1, Popov IE1,2, Dikov TI5,6, Sedloev TA8,9, Ionkov AS10,11, Timcheva KV7, Christova SL5,6, Kremensky IM1, Mitev VI1,2, Kaneva RP1,2.	BMC Cancer. 2015 Jul 17;15:523. doi: 10.1186/s12885-015-1516-2
2015	1	0	0	0	0	2	Pal T1, Bonner D1, Cragun D1, Monteiro AN1, Phelan C1, Servais L2, Kim J1, Narod SA3, Akbari MR3, Vadaparampil ST1.	Cancer. 2015 Dec 1;121(23):4173-80. doi: 10.1002/cncr.29645. Epub 2015 Aug 1
2015	0	0	0	0	1	0	Kwong A1, Chen J2, Shin VY2, Ho JC3, Law FB4, Au CH5, Chan TL4, Ma ES4, Ford JM6.	Cancer Genet. 2015 Sep;208(9):448-54. doi: 10.1016/j.cancergen.2015.05.031. Epub 2015 Jun 9
2015	0	0	0	0	3	0	James PA1, Sawyer S, Boyle S, Young MA, Kovalenko S, Doherty R, McKinley J, Alsop K, Beshay V, Harris M, Fox S, Lindeman GJ, Mitchell G.	Fam Cancer. 2015 Jun;14(2):287-95. doi: 10.1007/s10689-015-9785-0
2015	0	0	2	0	0	0	Ali SM1, Pal SK2, Wang K2, Palma NA2, Sanford E2, Bailey M2, He J2, Elvin JA2, Chmielecki J2, Squillace R2, Dow E2, Morosini D2, Buell J2, Yelensky R2, Lipson D2, Frampton GM2, Howley P2, Ross JS2, Stephens PJ2, Miller VA2	Oncologist. 2016 Jan;21(1):33-9. doi: 10.1634/theoncologist.2015-0241. Epub 2015 Dec 15
2015	0	1	0	0	0	1	Garre P1, Martín L, Sanz J, Romero A, Tosar A, Bando I, Llovet P, Diaque P, García-Paredes B, Díaz-Rubio E, de la Hoya M, Caldés T.	Clin Genet. 2015 Jun;87(6):582-7. doi: 10.1111/cge.12427. Epub 2014 Jun 1
2015	0	0	1	0	0	0	Furukawa T1, Sakamoto H2, Takeuchi S3, Ameri M3, Kuboki Y4, Yamamoto T3, Hatori T5, Yamamoto M5, Sugiyama M6, Ohike N7, Yamaguchi H8, Shimizu M8, Shibata N9, Shimizu K10, Shiratori K1	Sci Rep. 2015 Mar 6;5:8829. doi: 10.1038/srep08829.
2015	0	0	0	1	0	0	Ahlborn LB1, Steffensen AY, Jønson L, Djursby M, Nielsen FC, Gerdes AM, Hansen TV.	Fam Cancer. 2015 Mar;14(1):129-33. doi: 10.1007/s10689-014-9747-y.
2016	0	0	0	0	1	0	Hackmann K1,2,3,4, Kuhlee F5, Betcheva-Krajcir E5, Kahlert AK5, Mackenroth L5, Klink B5,6,7,8, Di Donato N5, Tzschach A5, Kast K6,7,8,9, Wimberger P6,7,8,9, Schrock E5,6,7,8, Rump A5,6,7,8.	Breast Cancer Res Treat. 2016 Oct;159(3):585-90. doi: 10.1007/s10549-016-3956-z. Epub 2016 Aug 31.
2016	1	2	0	0	0	0	Mucaki EJ1, Caminsky NG1, Perri AM1, Lu R2, Laederach A3, Halvorsen M4, Knoll JH5,6, Rogan PK7,8,9,10.	BMC Med Genomics. 2016 Apr 11;9:19. doi: 10.1186/s12920-016-0178-5
2016	1	0	0	0	0	0	Henouda S1, Bensalem A2, Reggad R3, Serrar N3, Rouabah L1, Pujol P4.	Dis Markers. 2016;2016:7869095. doi: 10.1155/2016/7869095. Epub 2016 Feb 22.
2016	1	0	0	0	0	17	Maistro S1, Teixeira N2, Encinas G1, Katayama ML1, Niewiadonski VD3,4, Cabral LG1, Ribeiro RM3, Gaburo Junior N4, de Gouvêa AC5, Carraro DM6, Sabino EC3, Diz MD5, Chammas R1, de Bock GH7, Folgueira MA8.	BMC Cancer. 2016 Dec 3;16(1):934
2016	0	0	1	0	0	0	Zorrieh Zahra A1, Kadkhoda S1, Behjati F2, Aghakhani Moghaddam F2, Badiei A2, Sirati F3, Afshin Alavi H4, Atri M3, Omranipour R3, Keyhani E2.	Int J Mol Cell Med. 2016 Spring;5(2):114-22. Epub 2016 May 9.
2016	2	3	2	0	0	2	Yassaee VR1, Ravesh Z, Soltani Z, Hashemi-Gorji F, Poorhosseini SM, Anbiaee R, Joulaee A.	Asian Pac J Cancer Prev. 2016;17(S3):149-53.
2016	2	0	1	0	0	0	Koczkowska M1, Zuk M1, Gorczynski A2, Ratajska M1, Lewandowska M3,4, Biernat W2, Limon J1, Wasag B1.	Cancer Med. 2016 Jul;5(7):1640-6. doi: 10.1002/cam4.748. Epub 2016 May 11
2016	4	0	0	0	0	3	Fernandes GC1, Michelli RA2, Galvão HC2, Paula AE1, Pereira R3,4, Andrade CE2, Felicio PS5, Souza CP2, Mendes DR1, Volc S2, Berardinelli GN1, Grasel RS2, Sabato CS1, Viana DV2, Mauad EC2,6, Scapulatempo-Neto C1,5,7, Arun B8, Reis RM1,2,5,9,10, Palmero EI1,2,5,11.	Oncotarget. 2016 Dec 6;7(49):80465-80481. doi: 10.18632/oncotarget.12610
2016	2	0	0	0	0	0	Ali SM1, Pal SK2, Wang K2, Palma NA2, Sanford E2, Bailey M2, He J2, Elvin JA2, Chmielecki J2, Squillace R2, Dow E2, Morosini D2, Buell J2, Yelensky R2, Lipson D2, Frampton GM2, Howley P2, Ross JS2, Stephens PJ2, Miller VA2.	Oncologist. 2016 Jan;21(1):33-9. doi: 10.1634/theoncologist.2015-0241. Epub 2015 Dec 15.
2016	0	0	0	0	0	1	Shin S1, Hwang IS2, Lee ST3, Choi JR4.	Breast Cancer Res Treat. 2016 Aug;158(3):433-40. doi: 10.1007/s10549-016-3891-z. Epub 2016 Jul 6.
2016	1	1	0	0	0	0	Mannan AU1, Singh J1, Lakshmikeshava R1, Thota N1, Singh S1, Sowmya TS1, Mishra A1, Sinha A1, Deshwal S1, Soni MR1, Chandrasekar A1, Ramesh B1, Ramamurthy B1, Padhi S1, Manek P1, Ramalingam R1, Kapoor S1, Ghosh M2, Sankaran S1, Ghosh A1, Veeramachaneni V1, Ramamoorthy P1,3, Hariharan R1,4, Subramanian K1.	J Hum Genet. 2016 Jun;61(6):515-22. doi: 10.1038/jhg.2016.4. Epub 2016 Feb 25.
2017	0	0	0	0	1	0	Torres D1,2, Bermejo JL3, Rashid MU1,4, Briceño I2,5, Gil F6, Beltran A7, Ariza V7, Hamann U8.	Sci Rep. 2017 Jul 5;7(1):4713. doi: 10.1038/s41598-017-05056-y.
2017	1	0	0	0	0	0	Kim DH1,2, Chae H3,4, Jo I1,5, Yoo J1,5, Lee H5, Jang W1,5, Park J1,5, Lee GD1, Jeon DS2, Lee KH6, Hur SY6, Chae BJ7, Song BJ7, Kim M1,5, Kim Y1,5.	BMC Med Genet. 2017 Mar 28;18(1):38. doi: 10.1186/s12881-017-0398-3.
2017	1	7	0	0	0	1	Atshemyan S1, Chavushyan A1, Berberian N2, Sahakyan A2, Zakharyan R1, Arakelyan A1.	F1000Res. 2017 Jan 10;6:29. doi: 10.12688/f1000research.10434.1. eCollection 2017
2017	0	0	0	0	0	3	Park HS1, Park SJ2, Kim JY1, Kim S1, Ryu J1, Sohn J3, Park S1, Kim GM3, Hwang IS4, Choi JR2,4, Kim SI1.	Ann Surg Treat Res. 2017 May;92(5):331-339. doi: 10.4174/astr.2017.92.5.331. Epub 2017 Apr 27.
2017	1	0	0	0	0	0	Qian Y1, Mancini-DiNardo D1, Judkins T1, Cox HC1, Brown K1, Elias M1, Singh N1, Daniels C1, Holladay J1, Coffee B1, Bowles KR1, Roa BB2.	Cancer Genet. 2017 Oct;216-217:159-169. doi: 10.1016/j.cancergen.2017.08.002. Epub 2017 Aug 24.
2017	0	0	0	0	1	0	Purshouse K1, Schuh A2, Fairfax BP1,3, Knight S3, Antoniou P2, Dreau H2, Popitsch N3, Gatter K4, Roberts I5, Browning L6, Traill Z7, Kerr D1, Verrill C6, Tuthill M1, Taylor JC2,3, Protheroe A1.	Cold Spring Harb Mol Case Stud. 2017 May;3(3):a001362. doi: 10.1101/mcs.a001362
2017	0	1	0	0	0	0	Elimam AA1,2, Aabdein MEMM3,4, Eldeen MEM5, Altayb HN6,7, Taha MA4, Nimir MN4,8, Dafaalla MD4, Alfaki MM4, Abdelrahim MA4, Abdalla AA4,9, Mohammed MI4, Ellaithi M10, Hamid MMA8, Hassan MAS7.	BMC Med Genet. 2017 Aug 16;18(1):85. doi: 10.1186/s12881-017-0448-x
2017	0	0	0	0	16	0	Yaping Qian1, Debora Mancini-DiNardo1, Thaddeus Judkins, Hannah C. Cox, Krystal Brown, Maria Elias, Nanda Singh, Courtney Daniels, Jayson Holladay, Bradford Coffee, Karla R. Bowles, Benjamin B. Roa	Cancer Genet. 2017 Oct;216-217:159-169. doi: 10.1016/j.cancergen.2017.08.002. Epub 2017 Aug 24.
2017	6	6	0	0	0	1	Seth K. RummelLeann LovejoyCraig D. ShriverRachel E. Ellswort	Breast Cancer Res Treat. 2017 Aug;164(3):593-601. doi: 10.1007/s10549-017-4291-8. Epub 2017 May 13
2017	8	10	0	0	0	0	Santonocito C1, Scapaticci M2, Guarino D1, Bartolini A3, Minucci A1, Concolino P1, Scambia G4, Paris I4, Capoluongo E1.	Breast. 2017 Dec;36:74-78. doi: 10.1016/j.breast.2017.09.007. Epub 2017 Oct 8.
2017	0	0	0	0	0	1	Cock-Rada AM1,2,3, Ossa CA4, Garcia HI4,5, Gomez LR4,5.	Fam Cancer. 2017 May 20. doi: 10.1007/s10689-017-0004-z.
2017	0	0	0	0	1	0	Concolino P1, Rizza R2, Hackmann K3,4,5,6, Minucci A2, Scaglione GL2, De Bonis M2, Costella A2, Zuppi C2, Schrock E3,4,5,6, Capoluongo E2.	Mol Diagn Ther. 2017 Jun 15. doi: 10.1007/s40291-017-0288-6. [Epub ahead of print
2017	0	6	0	1	0	6	Jarhelle E1,2, Riise Stensland HM1,3, Mæhle L4, Van Ghelue M5,6,7	Fam Cancer. 2017 Jan;16(1):1-16. doi: 10.1007/s10689-016-9916-2
2017	1	6	0	0	0	0	Capone GL1, Putignano AL1, Saavedra ST1, Paganini I1, Sestini R1, Gensini F1, De Rienzo I1, Papi L2, Porfirio B1.	J Mol Diagn. 2017 Oct 20. pii: S1525-1578(17)30338-0. doi: 10.1016/j.jmoldx.2017.09.005. [Epub ahead of print]
2017	0	3	0	3	0	7	Zanella I1, Merola F2, Biasiotto G3, Archetti S2, Spinelli E4, Di Lorenzo D2.	Exp Mol Pathol. 2017 Apr;102(2):314-320. doi: 10.1016/j.yexmp.2017.03.001. Epub 2017 Mar 2
2017	1	0	0	0	0	0	Yang XR1, Devi BCR2, Sung H3, Guida J3, Mucaki EJ4, Xiao Y3, Best A3, Garland L5, Xie Y3, Hu N3, Rodriguez-Herrera M3, Wang C3, Jones K5, Luo W5, Hicks B5, Tang TS2, Moitra K3,6, Rogan PK4, Dean M3.	Breast Cancer Res Treat. 2017 Oct;165(3):687-697. doi: 10.1007/s10549-017-4356-8. Epub 2017 Jun 29.
2017	1	0	1	0	0	0	Ahmadloo S1, Nakaoka H1, Hayano T1, Hosomichi K2, You H3, Utsuno E4, Sangai T4, Nishimura M4,5, Matsushita K4,5, Hata A6,7, Nomura F8, Inoue I1.	J Hum Genet. 2017 Apr;62(5):561-567. doi: 10.1038/jhg.2017.5. Epub 2017 Feb 9.
